# Supplementary material for: Multi-proxy speleothem-based reconstruction of mid-MIS 3 climate in South Africa
Source: Copernicus journal article supplement (doi:10.5194/cp-2023-1), 2023-01-19
Supplement: Supplementary file 1 [file cp-2023-1-supplement-version2.zip]

Archive with 2 entries (2 files):
- Supplementary data.xlsx
- Supplementary material_revised.pdf
