# Supplementary material for: Multi-proxy speleothem-based reconstruction of mid-MIS 3 climate in South Africa
Source: Copernicus journal article supplement (doi:10.5194/cp-2023-1), 2023-01-19
Supplement: Supplementary file 1 [file cp-2023-1-supplement-version2.zip › Supplementary data.xlsx]

## Sheet: U-Th data
Depth [mm]	238U [ppm]	±	232Th [ppb]	±	(234U/238U)*	±	(230Th/238U)*	±	(230Th/232Th)*	±	230Th Age [ka]	±	(234U/238U)0	±	230Th Age [ka BP]**	±
2.5	0.518543	0.00161481	0.105613	0.000329367	2.94313	0.0126733	0.0347047	0.000171474	520.763	2.57454	1.28844	0.00848667	2.95024	0.0126889	1.21944	0.00848667
26.5	0.52848	0.00195109	0.282829	0.00107005	2.92852	0.0149577	0.0652592	0.000348846	372.676	2.01585	2.44521	0.0182515	2.94193	0.0149924	2.37621	0.0182515
80	0.668161	0.00147412	0.272292	0.00073132	2.77413	0.00858899	0.0661825	0.000255247	496.336	2.05966	2.61966	0.013089	2.78735	0.00861161	2.55066	0.013089
84.5	0.587978	0.00194325	0.0537735	0.000178952	2.81509	0.0101132	0.0757757	0.000226771	2532.26	12.2774	2.95937	0.0140012	2.83038	0.0101426	2.89037	0.0140012
93	0.603862	0.00135543	0.856682	0.00221695	2.80664	0.00892773	0.0767866	0.000292703	165.42	0.665584	3.00843	0.0151123	2.82211	0.00895433	2.93943	0.0151123
149	0.557542	0.00185183	0.0292851	0.000103977	2.89187	0.0104828	0.0974868	0.000295711	5672.35	28.5415	3.71631	0.0178263	2.9119	0.0105198	3.64731	0.0178263
185	0.71166	0.00157591	0.252139	0.000573561	2.81068	0.00899178	0.15986	0.000562716	1378.98	4.90687	6.33069	0.0308695	2.84346	0.00904668	6.26169	0.0308695
187	0.665916	0.00243278	0.390423	0.00142187	2.85355	0.0106784	0.208394	0.000688521	1086.31	5.91104	8.18335	0.0421985	2.89704	0.0107596	8.11435	0.0421985
196.5	0.723037	0.00162371	3.47512	0.00810035	3.14729	0.010056	1.11144	0.00378714	706.743	2.44832	44.9963	0.250495	3.43931	0.0103038	44.9273	0.250495
232	0.623048	0.00226061	4.18023	0.0154744	3.08878	0.014962	1.15195	0.00587231	524.734	2.70254	48.0315	0.40771	3.39334	0.0153477	47.9625	0.40771
251	0.471824	0.00150073	0.187274	0.000657458	2.93719	0.0105742	1.06683	0.00311324	8214.53	39.7899	46.5981	0.260303	3.21065	0.0108374	46.5291	0.260303
302	0.516858	0.00169675	0.129379	0.000442644	2.88963	0.0132361	1.04432	0.00485144	12750.5	60.4939	46.3406	0.363412	3.15481	0.0136092	46.2716	0.363412
304	0.49	0.00155157	0.468522	0.00149135	2.87031	0.012593	1.0329	0.00451564	3301.49	14.4733	46.1126	0.343139	3.1314	0.0129487	46.0436	0.343139
345	0.671754	0.0018649	3.18324	0.00832518	2.91043	0.0130189	1.05472	0.00439692	680.245	2.76414	46.4834	0.342069	3.17941	0.0133675	46.4144	0.342069
327	0.406675	0.00142405	0.50757	0.00148775	2.74	0.0130211	0.985059	0.00421236	2412.12	9.22178	46.2427	0.356184	2.98255	0.0134052	46.1737	0.356184
353.5	0.505122	0.00180731	0.43586	0.00124321	2.92086	0.0142717	1.0516	0.00472404	3724.66	14.6706	46.2467	0.368912	3.18865	0.0146478	46.1777	0.368912
362.5	0.480081	0.00174275	0.426405	0.00128585	2.82112	0.013154	1.02483	0.00462754	3526.38	14.2393	46.7833	0.365987	3.07815	0.0135335	46.7143	0.365987
377.5	0.43113	0.000594096	0.315873	0.00653053	2.63792	0.00589336	0.964425	0.0018	6813.93	147.12	47.2203	0.125783	2.87139	0.00649544	47.1513	0.125783
382.5	0.4188	0.000667293	0.181457	0.00391474	2.64622	0.00551796	0.967382	0.0017	4017.27	83.156	47.2145	0.126781	2.88086	0.006095	47.1455	0.126781
391.5	0.423586	0.00146379	0.492593	0.00147281	2.70447	0.0131174	0.994821	0.00424636	2614.48	10.1989	47.5412	0.372334	2.9492	0.0135143	47.4722	0.372334
427.5	0.451209	0.00107776	0.606715	0.00155072	2.74479	0.00958193	0.950633	0.0037153	2160.69	8.67015	44.1175	0.275612	2.97714	0.00988331	44.0485	0.275612
Decay constants are from Bourdon et al. (2003) and 𝜆230 and 𝜆234 are from Cheng et al. (2013)
* Activity ratios
** BP stands fro 'Before Present' where 'Present' is defined as the year 1950 A.D.

## Sheet: Age model
U-Th dates				StalAge output
Depth [mm]	Age [ka]	±		Depth [mm]	Age [ka]	Age min [ka]	Age max [ka]
2.5	1.28844	0.00848667		1	1.46487	1.77787	1.11049
26.5	2.44521	0.0182515		2	1.48261	1.7932	1.13288
80	2.61966	0.013089		3	1.50034	1.80758	1.15522
84.5	2.95937	0.0140012		4	1.5181	1.82041	1.17751
93	3.00843	0.0151123		5	1.53597	1.83705	1.19996
149	3.71631	0.0178263		6	1.5542	1.86895	1.22266
185	6.33069	0.0308695		7	1.57369	1.94601	1.24504
187	8.18335	0.0421985		8	1.59509	2.08807	1.26715
196.5	44.9963	0.250495		9	1.6174	2.25611	1.29213
232	48.0315	0.40771		10	1.64008	2.40499	1.32199
251	46.5981	0.260303		11	1.66588	2.52385	1.3512
302	46.3406	0.363412		12	1.69674	2.61128	1.37475
304	46.1126	0.343139		13	1.72812	2.66932	1.39746
345	46.4834	0.342069		14	1.7561	2.70237	1.4244
327	46.2413	0.3558		15	1.78565	2.72066	1.45166
353.5	46.245	0.368509		16	1.82119	2.73386	1.47474
362.5	46.785	0.365801		17	1.85578	2.74349	1.49551
377.5	47.2203	0.125783		18	1.88234	2.74949	1.51679
382.5	47.2145	0.126781		19	1.90434	2.75363	1.53852
391.5	47.5408	0.368999		20	1.92651	2.75785	1.56009
427.5	44.1175	0.275612		21	1.94793	2.76287	1.58155
				22	1.96698	2.76866	1.60308
				23	1.98495	2.77353	1.62469
				24	2.00322	2.77604	1.64633
				25	2.02082	2.7776	1.66793
				26	2.0367	2.77985	1.68944
				27	2.05175	2.78255	1.71088
				28	2.06707	2.78517	1.7323
				29	2.08249	2.78769	1.75373
				30	2.09776	2.79024	1.77521
				31	2.11353	2.79282	1.79668
				32	2.1303	2.79539	1.81814
				33	2.14697	2.79796	1.83983
				34	2.16254	2.80052	1.8619
				35	2.17773	2.80309	1.88397
				36	2.19344	2.80566	1.90567
				37	2.20938	2.80822	1.92719
				38	2.22509	2.8108	1.94878
				39	2.24068	2.81346	1.97041
				40	2.2563	2.81628	1.99195
				41	2.27177	2.81917	2.01344
				42	2.28706	2.82202	2.0349
				43	2.30297	2.82488	2.05622
				44	2.32008	2.82776	2.07735
				45	2.33722	2.83058	2.09844
				46	2.35318	2.83325	2.11964
				47	2.36846	2.8358	2.14085
				48	2.38379	2.83831	2.16195
				49	2.39924	2.84081	2.18318
				50	2.41473	2.8433	2.20473
				51	2.43025	2.84582	2.22635
				52	2.4458	2.84843	2.24774
				53	2.46126	2.85121	2.26895
				54	2.47655	2.85418	2.29008
				55	2.49166	2.85726	2.31128
				56	2.50671	2.86032	2.33266
				57	2.52206	2.86331	2.35413
				58	2.53795	2.86624	2.37557
				59	2.55402	2.86923	2.39698
				60	2.56981	2.87241	2.41832
				61	2.58541	2.87567	2.43953
				62	2.60099	2.87889	2.46059
				63	2.61662	2.8821	2.48191
				64	2.63237	2.88534	2.50376
				65	2.6483	2.88851	2.52554
				66	2.66441	2.89155	2.54664
				67	2.68037	2.89447	2.56741
				68	2.69586	2.89739	2.58828
				69	2.71104	2.90054	2.6093
				70	2.72617	2.90411	2.63039
				71	2.74147	2.90778	2.65162
				72	2.75705	2.91129	2.67297
				73	2.77268	2.91499	2.69419
				74	2.78813	2.91935	2.71513
				75	2.80352	2.92455	2.73624
				76	2.81897	2.93026	2.75792
				77	2.83435	2.93421	2.77947
				78	2.84956	2.93486	2.80026
				79	2.86484	2.93547	2.82077
				80	2.88038	2.93921	2.84158
				81	2.89582	2.94417	2.86231
				82	2.91073	2.94822	2.88228
				83	2.92489	2.95356	2.90044
				84	2.93822	2.96296	2.91232
				85	2.95102	2.9773	2.91817
				86	2.96349	2.99533	2.92244
				87	2.97531	3.00929	2.92742
				88	2.98623	3.01335	2.93497
				89	2.99713	3.01594	2.94308
				90	3.00888	3.02593	2.94953
				91	3.02115	3.03971	2.95509
				92	3.03345	3.05198	2.96097
				93	3.04561	3.06314	2.96715
				94	3.0576	3.07466	2.97334
				95	3.06951	3.0865	2.97955
				96	3.08143	3.09832	2.98579
				97	3.09338	3.11015	2.99195
				98	3.10536	3.12209	2.99788
				99	3.11733	3.13407	3.00361
				100	3.12925	3.14603	3.00923
				101	3.14111	3.15796	3.01492
				102	3.15293	3.16989	3.02081
				103	3.16475	3.18187	3.02686
				104	3.17663	3.19392	3.03297
				105	3.18858	3.20609	3.03912
				106	3.20057	3.21834	3.04529
				107	3.21258	3.23046	3.05146
				108	3.2246	3.24233	3.05761
				109	3.23662	3.25433	3.0637
				110	3.24838	3.26681	3.06969
				111	3.25438	3.27933	3.07563
				112	3.26038	3.29145	3.08154
				113	3.26636	3.30337	3.08741
				114	3.27232	3.31538	3.09324
				115	3.27828	3.32752	3.09903
				116	3.28424	3.33975	3.10482
				117	3.29022	3.35209	3.11069
				118	3.29622	3.36453	3.11666
				119	3.30221	3.37702	3.12255
				120	3.30818	3.38946	3.12822
				121	3.31414	3.40182	3.1339
				122	3.32013	3.41411	3.13977
				123	3.32611	3.42644	3.14568
				124	3.33208	3.43894	3.15143
				125	3.33803	3.45146	3.15704
				126	3.34399	3.46386	3.1626
				127	3.34996	3.47624	3.1683
				128	3.35596	3.48868	3.17419
				129	3.36192	3.50116	3.17983
				130	3.36781	3.51364	3.18505
				131	3.37374	3.52613	3.19136
				132	3.37976	3.53867	3.19916
				133	3.38562	3.55124	3.20285
				134	3.39127	3.56382	3.20285
				135	3.39759	3.57636	3.2143
				136	3.40481	3.58884	3.24865
				137	3.40954	3.60147	3.24865
				138	3.41084	3.61428	3.24865
				139	3.42124	3.62629	3.24865
				140	3.44304	3.63682	3.24865
				141	3.44667	3.64727	3.27494
				142	3.4503	3.65902	3.29839
				143	3.45393	3.67112	3.32571
				144	3.45756	3.68274	3.37424
				145	3.52111	3.6957	3.43188
				146	3.56943	3.71057	3.48408
				147	3.6041	3.72028	3.53582
				148	3.64157	3.72407	3.59483
				149	3.71726	3.75415	3.68024
				150	3.79392	3.83758	3.7092
				151	3.8724	3.94791	3.7106
				152	3.954	4.05351	3.7191
				153	4.03756	4.15563	3.73349
				154	4.12146	4.26122	3.74574
				155	4.20455	4.36705	3.75643
				156	4.28622	4.46909	3.76771
				157	4.36754	4.57023	3.77937
				158	4.44972	4.67391	3.79083
				159	4.53285	4.77884	3.80217
				160	4.61669	4.88326	3.81358
				161	4.70071	4.9881	3.82493
				162	4.7846	5.09462	3.83616
				163	4.86916	5.20256	3.84777
				164	4.95546	5.31126	3.86011
				165	5.04452	5.41991	3.87246
				166	5.13627	5.52792	3.87903
				167	5.22664	5.63559	3.88452
				168	5.3129	5.74334	3.88996
				169	5.40204	5.85104	3.89586
				170	5.50058	5.95851	3.90256
				171	5.60368	6.0657	3.90932
				172	5.70537	6.17272	3.91539
				173	5.80669	6.27998	3.921
				174	5.90998	6.38792	3.92674
				175	6.01581	6.49676	3.9338
				176	6.12333	6.6064	3.94206
				177	6.22796	6.71579	3.94568
				178	6.32643	6.82434	3.94568
				179	6.42451	6.93434	3.95802
				180	6.52801	7.04792	3.99619
				181	6.6339	7.16346	3.99619
				182	6.7383	7.27874	3.99619
				183	6.84286	7.39274	4.12311
				184	6.94897	7.5049	5.27101
				185	7.05134	7.61514	6.43528
				186	7.1453	7.72369	6.65851
				187	7.23528	7.83158	6.65851
				188	7.32664	7.93972	6.66698
				189	7.41923	8.04802	6.73814
				190	7.51184	8.15622	6.82966
				191	7.60443	8.26446	6.88957
				192	7.69719	8.37289	6.96078
				193	7.79005	8.4813	7.04046
				194	7.88289	8.58953	7.1173
				195
				196
				197	45.2331	45.8091	44.6046
				198	45.2447	45.8144	44.6218
				199	45.2556	45.8197	44.6387
				200	45.2619	45.8289	44.6349
				201	45.2706	45.8336	44.6512
				202	45.2799	45.8381	44.6675
				203	45.2911	45.8425	44.6839
				204	45.3029	45.8472	44.7002
				205	45.3137	45.8521	44.7164
				206	45.3241	45.8563	44.7328
				207	45.3352	45.8596	44.7497
				208	45.3468	45.8655	44.7673
				209	45.3588	45.8765	44.7857
				210	45.3708	45.888	44.8054
				211	45.3827	45.8947	44.8265
				212	45.3944	45.8977	44.8477
				213	45.4062	45.9003	44.8677
				214	45.4182	45.9087	44.887
				215	45.4309	45.929	44.9063
				216	45.4437	45.9646	44.9256
				217	45.456	46.0149	44.9452
				218	45.469	46.0668	44.9659
				219	45.4833	46.1061	44.9879
				220	45.4971	46.1264	45.0096
				221	45.5093	46.1296	45.0297
				222	45.5228	46.1403	45.0485
				223	45.5404	46.1787	45.0668
				224	45.5593	46.2231	45.0848
				225	45.5762	46.2483	45.102
				226	45.5911	46.2583	45.1174
				227	45.605	46.2632	45.1305
				228	45.6191	46.2688	45.1445
				229	45.6344	46.2783	45.162
				230	45.651	46.2881	45.1803
				231	45.6688	46.2946	45.1965
				232	45.6854	46.3001	45.2109
				233	45.6991	46.307	45.2246
				234	45.7126	46.3114	45.2398
				235	45.7284	46.3114	45.2576
				236	45.7437	46.3125	45.2763
				237	45.7559	46.3218	45.2943
				238	45.768	46.3326	45.3123
				239	45.7832	46.3379	45.3315
				240	45.799	46.3389	45.3507
				241	45.8125	46.3389	45.3688
				242	45.8238	46.3389	45.3854
				243	45.8336	46.3389	45.4008
				244	45.8427	46.3393	45.4144
				245	45.852	46.34	45.4261
				246	45.8617	46.3411	45.4389
				247	45.8721	46.3428	45.455
				248	45.8839	46.3453	45.4718
				249	45.8973	46.3486	45.4865
				250	45.9098	46.3517	45.5002
				251	45.919	46.3536	45.5148
				252	45.9266	46.3546	45.53
				253	45.9345	46.355	45.5452
				254	45.9421	46.3554	45.5602
				255	45.9489	46.3558	45.5748
				256	45.9562	46.3562	45.5888
				257	45.9656	46.3567	45.6023
				258	45.9758	46.3571	45.6141
				259	45.9854	46.3576	45.6215
				260	45.9948	46.358	45.6276
				261	46.0015	46.3585	45.6308
				262	46.0069	46.3589	45.6344
				263	46.0126	46.3592	45.6412
				264	46.0183	46.3598	45.649
				265	46.0236	46.3608	45.6555
				266	46.028	46.3625	45.6618
				267	46.0314	46.365	45.669
				268	46.0349	46.3695	45.6733
				269	46.0393	46.3765	45.6733
				270	46.0436	46.3844	45.6733
				271	46.0467	46.3911	45.6733
				272	46.0493	46.3959	45.6733
				273	46.0521	46.3985	45.6733
				274	46.055	46.4007	45.6733
				275	46.0576	46.4041	45.6733
				276	46.0589	46.4085	45.6733
				277	46.059	46.4131	45.6733
				278	46.059	46.418	45.6733
				279	46.0591	46.4218	45.6733
				280	46.0592	46.4233	45.6733
				281	46.0592	46.4233	45.6733
				282	46.0593	46.4233	45.6734
				283	46.0594	46.4239	45.6753
				284	46.0594	46.4257	45.6773
				285	46.0595	46.4271	45.6784
				286	46.0596	46.4291	45.6792
				287	46.0597	46.4326	45.6805
				288	46.0597	46.4368	45.6824
				289	46.0598	46.4409	45.6848
				290	46.0599	46.445	45.6879
				291	46.0599	46.4496	45.6919
				292	46.06	46.454	45.6973
				293	46.0637	46.4577	45.7043
				294	46.0688	46.4613	45.7117
				295	46.074	46.4652	45.7184
				296	46.0791	46.4682	45.7251
				297	46.0842	46.4694	45.7324
				298	46.0894	46.4699	45.7461
				299	46.0951	46.4712	45.7625
				300	46.1007	46.4733	45.779
				301	46.1061	46.476	45.7954
				302	46.1117	46.4787	45.8118
				303	46.118	46.4813	45.8281
				304	46.1298	46.4845	45.8389
				305	46.1425	46.4887	45.847
				306	46.1531	46.4918	45.8543
				307	46.1574	46.4919	45.8609
				308	46.1635	46.4919	45.871
				309	46.1725	46.494	45.8854
				310	46.1758	46.4969	45.887
				311	46.1771	46.4969	45.887
				312	46.1784	46.4969	45.887
				313	46.1797	46.4969	45.887
				314	46.1809	46.4969	45.8963
				315	46.1878	46.4969	45.906
				316	46.195	46.5076	45.914
				317	46.2059	46.5137	45.9213
				318	46.2197	46.5168	45.929
				319	46.2331	46.5214	45.9335
				320	46.2468	46.527	45.9381
				321	46.2613	46.5322	45.944
				322	46.2758	46.5371	45.9496
				323	46.2894	46.5423	45.9566
				324	46.3026	46.5475	45.9639
				325	46.3159	46.5527	45.9695
				326	46.3289	46.558	45.9699
				327	46.3415	46.5634	45.9699
				328	46.354	46.5688	45.9699
				329	46.3668	46.5745	45.9699
				330	46.3798	46.5848	45.9699
				331	46.3927	46.5962	45.9699
				332	46.4058	46.6082	45.9699
				333	46.4192	46.62	45.9699
				334	46.4328	46.6318	45.9699
				335	46.4464	46.6438	45.9699
				336	46.4601	46.6557	45.9699
				337	46.4738	46.6673	45.9699
				338	46.4876	46.6787	45.9699
				339	46.5014	46.6899	45.9741
				340	46.5154	46.7017	45.9796
				341	46.5298	46.7144	45.9832
				342	46.5447	46.7272	45.9867
				343	46.5599	46.7393	45.993
				344	46.5753	46.7516	46.003
				345	46.5907	46.7649	46.019
				346	46.6063	46.7787	46.0473
				347	46.6223	46.792	46.0728
				348	46.6386	46.8053	46.0972
				349	46.6554	46.8191	46.1236
				350	46.6724	46.833	46.1542
				351	46.6893	46.847	46.189
				352	46.706	46.861	46.2225
				353	46.7223	46.8751	46.2495
				354	46.7387	46.8894	46.2737
				355	46.7553	46.904	46.2991
				356	46.772	46.9185	46.3216
				357	46.7883	46.9326	46.3371
				358	46.8046	46.9466	46.3484
				359	46.8214	46.9608	46.359
				360	46.8382	46.9755	46.368
				361	46.8547	46.9906	46.3738
				362	46.8711	47.006	46.3749
				363	46.8878	47.0215	46.3749
				364	46.9046	47.0372	46.3749
				365	46.9213	47.0536	46.3751
				366	46.9381	47.0699	46.3759
				367	46.9552	47.0856	46.3777
				368	46.9724	47.1009	46.3823
				369	46.9896	47.1162	46.3926
				370	47.0068	47.1314	46.4106
				371	47.0242	47.1467	46.4387
				372	47.042	47.1624	46.4828
				373	47.0603	47.1788	46.5493
				374	47.0788	47.1957	46.6442
				375	47.0974	47.2129	46.7665
				376	47.1161	47.2305	46.889
				377	47.1356	47.2489	46.983
				378	47.1562	47.2685	47.0423
				379	47.1781	47.2899	47.0695
				380	47.1994	47.315	47.0808
				381	47.2187	47.3462	47.0932
				382	47.238	47.3866	47.112
				383	47.2594	47.4397	47.1376
				384	47.2838	47.5088	47.1625
				385	47.311	47.5955	47.1797
				386	47.3392	47.6952	47.1927
				387	47.3664	47.8006	47.2064
				388	47.3909	47.8991	47.2203
				389	47.4117	47.9815	47.233
				390	47.4307	48.0581	47.2446
				391	47.4498	48.1405	47.2554
				392	47.4691	48.2261	47.266
				393	47.4884	48.3099	47.2768
				394	47.5073	48.3921	47.2882
				395	47.526	48.4739	47.3002
				396	47.5448	48.5557	47.312
				397	47.5643	48.6376	47.3229
				398	47.5837	48.7201	47.3334
				399	47.6025	48.8035	47.3439
				400	47.6213	48.8862	47.3544
				401	47.6409	48.9672	47.365
				402	47.6604	49.0501	47.3757
				403	47.6788	49.1362	47.3863
				404	47.697	49.2148	47.3963
				405	47.716	49.2781	47.405
				406	47.7355	49.3417	47.4129
				407	47.7549	49.4213	47.4206
				408	47.7743	49.5086	47.429
				409	47.7937	49.5924	47.439
				410	47.8132	49.674	47.4492
				411	47.8329	49.7571	47.4583
				412	47.852	49.8442	47.4667
				413	47.8703	49.9344	47.4752
				414	47.8893	50.0164	47.484
				415	47.9103	50.0821	47.4931
				416	47.9317	50.1464	47.5023
				417	47.9517	50.2244	47.5114
				418	47.9707	50.3099	47.5201
				419	47.9895	50.3938	47.5284
				420	48.0079	50.4782	47.538
				421	48.0256	50.5662	47.5501
				422	48.0441	50.6544	47.5628
				423	48.0649	50.7403	47.5739
				424	48.0858	50.8302	47.5832
				425	48.105	50.9276	47.5912
				426	48.1235	51.0148	47.5992
				427	48.1425	51.0769	47.6079
				428	48.162	51.1324	47.6177
				429	48.1814	51.2013	47.628
				430	48.2006	51.2794	47.6377
				431	48.2198	51.3585	47.6461
				432	48.2395	51.439	47.6553
				433	48.26	51.522	47.667
				434	48.2802	51.602	47.6787
				435	48.2994	51.674	47.6878
				436	48.3178	51.7415	47.6958
				437	48.3361	51.8103	47.7042
				438	48.3551	51.8882	47.7117
				439	48.375	51.9795	47.7174
				440	48.3934	52.0752	47.7266

## Sheet: Calcite
Depth [mm]	𝛿13C [‰VPDB]	𝛿18O [‰VPDB]		Depth [mm]	Sr/Ca [*105]
1	-2.57	-2.58		3	547.121
2	-3.451	-3.116		4	565.612
3	-4.0983	-3.3766		5	503.408
4	-4.548	-3.224		6	453.528
5	-4.248	-3.29		7	461.235
6	-5.85	-3.973		8	503.535
7	-5.3226	-3.8547		9	493.841
8	-3.6499	-3.0287		10	421.405
9	-5.305	-3.446		11	391.523
10	-5.821	-3.644		12	427.461
11	-3.9315	-3.2739		13	430.19
12	-4.519	-3.454		14	451.056
13	-4.718	-3.81		15	499.551
14	-5.121	-3.888		16	480.323
15	-5.381	-3.8		17	461.375
16	-5.483	-4.076		18	488.072
17	-6.105	-4.132		19	504.49
18	-5.787	-3.783		20	445.407
19	-5.635	-3.658		21	417.542
20	-5.575	-3.942		22	439.01
21	-6.411	-4.281		23	474.144
22	-6.5	-4.398		24	499.291
23	-6.189	-4.252		25	513.686
24	-5.094	-3.849		26	532.806
25	-4.807	-3.661		27	535.91
26	-5.801	-4.161		28	610.924
27	-5.04	-3.646		29	634.211
28	-5.075	-3.702		30	605.47
29	-6.715	-4.447		31	685.025
30	-5.333	-3.83		32	618.045
31	-5.31	-3.505		33	509.936
32	-6.075	-3.91		34	506.649
33	-4.369	-3.172		35	485.218
34	-5.493	-3.688		36	453.937
35	-5.791	-3.698		37	477.278
36	-5.059	-3.58		38	466.954
37	-5.178	-3.56		39	450.242
38	-6.065	-4.072		40	469.214
39	-6.837	-4.314		41	513.041
40	-4.672	-3.479		42	486.261
41	-5.543	-4.091		43	509.52
42	-5.681	-4.107		44	557.531
43	-5.272	-3.674		45	493.759
44	-5.695	-3.907		46	461.823
45	-5.914	-4.033		47	465.381
46	-5.086	-3.716		48	472.527
47	-5.399	-3.831		49	483.027
48	-6.2263	-4.3002		50	497.556
49	-5.684	-3.872		51	498.397
50	-5.289	-3.733		52	514.781
51	-6.244	-4.349		53	587.178
52	-6.456	-4.479		54	686.802
53	-6.862	-4.57		55	621.259
54	-5.725	-3.858		56	502.448
55	-5.175	-3.636		57	479.096
56	-5.974	-3.908		58	520.37
57	-5.069	-3.648		59	527.121
58	-3.981	-3.408		60	557.357
59	-5.503	-4.199		61	555.64
60	-5.836	-4.191		62	511.011
61	-4.774	-3.611		63	474.968
62	-3.98	-3.471		64	480.925
63	-5.006	-3.909		65	532.861
64	-4.925	-4.091		66	598.418
65	-5.369	-4.159		67	646.533
66	-6.603	-4.49		68	623.357
67	-5.954	-4.197		69	555.363
68	-3.965	-3.29		70	569.473
69	-5.126	-3.822		71	644.905
70	-5.993	-4.251		72	677.747
71	-5.664	-3.882		73	618.199
72	-5.704	-3.855		74	600.574
73	-5.828	-3.79		75	578.463
74	-5.909	-3.83		76	543.987
75	-5.947	-3.787		77	521.928
76	-6.3	-3.991		78	549.536
77	-5.621	-3.778		79	500.964
78	-5.314	-3.636		80	524.393
79	-5.879	-3.818		81	496.723
80	-4.382	-3.267		82	513.018
81	-4.927	-3.488		83	527.646
82	-6.043	-4.045		84	523.566
83	-5.605	-3.744		85	507.347
84	-5.602	-3.737		86	498.753
85	-6.303	-3.915		87	490.312
86	-4.366	-3.421		88	516.355
87	-4.814	-3.597		89	511.837
88	-4.892	-3.524		90	556.179
89	-7.131	-4.292		91	588.649
90	-5.4554	-3.8822		92	544.008
91	-6.712	-4.259		93	498.128
92	-6.956	-4.192		94	524.735
93	-5.916	-3.879		95	517.652
94	-4.641	-3.547		96	534.13
95	-4.898	-3.717		97	572.116
96	-5.287	-3.918		98	547.479
97	-6.894	-4.443		99	530.492
98	-7.7861	-3.6696		100	533.04
99	-6.341	-4.258		101	502.228
100	-4.528	-3.617		102	483.535
101	-6.218	-4.098		103	507.286
102	-7.531	-4.567		104	518.394
103	-7.479	-4.551		105	482.838
104	-7.649	-4.694		106	437.949
105	-6.604	-4.312		107	442.434
106	-6.345	-4.174		108	422.044
107	-4.604	-3.658		109	426.935
108	-6.637	-4.324		110	437.223
109	-6.484	-4.226		111	425.114
110	-6.379	-4.195		112	419.3
111	-6.224	-4.269		113	438.161
112	-6.046	-4.297		114	500.777
113	-6.764	-4.642		115	463.255
114	-7.421	-4.87		116	433.565
115	-7.453	-4.556		117	437.983
116	-6.4131	-4.4986		118	418.071
117	-7.038	-4.464		119	426.189
118	-7.468	-4.614		120	404.011
119	-7.291	-4.462		121	387.687
120	-6.662	-4.303		122	387.407
121	-6.115	-4.143		123	391.449
122	-5.514	-3.984		124	400.41
123	-6.044	-4.167		125	405.78
124	-6.995	-4.603		126	464.002
125	-7.845	-4.873		127	556.36
126	-7.692	-4.959		128	497.018
127	-6.56	-4.435		129	379.259
128	-7.096	-4.53		130	383.738
129	-7.428	-4.509		131	438.079
130	-5.813	-4.123		132	421.573
131	-6.479	-4.336		133	388.61
132	-7.217	-4.597		134	397.906
133	-6.994	-4.434		135	407.544
134	-7.003	-4.442		136	452.688
135	-8.01	-4.758		137	470.836
136	-6.468	-4.43		138	436.636
137	-6.058	-4.204		139	446.469
138	-8.009	-4.879		140	438.6
139	-8.225	-4.778		141	534.336
140	-8.429	-5.048		142	478.676
141	-7.835	-4.642		143	409.754
142	-6.799	-4.397		144	340.627
143	-7.466	-4.448		145	336.586
144	-6.815	-4.389		146	303.408
145	-7.907	-4.652		147	287.485
146	-8.363	-4.764		148	303.019
147	-8.624	-4.791		149	317.591
148	-7.955	-4.637		150	328.196
149	-8.025	-4.733		151	387.883
150	-8.329	-4.947		152	381.428
151	-7.575	-4.627		153	338.049
152	-8.185	-4.759		154	384.031
153	-8.513	-4.889		155	424.405
154	-8.14	-4.923		156	325.593
155	-7.651	-4.562		157	305.335
156	-8.303	-4.757		158	310.566
157	-8.343	-4.767		159	354.842
158	-8.461	-4.855		160	357.275
159	-7.712	-4.559		161	337.577
160	-7.757	-4.681		162	330.792
161	-8.152	-4.704		163	304.589
162	-7.881	-4.638		164	309.151
163	-8.091	-4.653		165	332.8
164	-7.981	-4.708		166	299.615
165	-8.119	-4.604		167	331.626
166	-8.033	-4.642		168	358.903
167	-8.004	-4.699		169	383.339
168	-7.302	-4.527		170	365.107
169	-7.935	-4.666		171	312.264
170	-8.234	-4.795		172	294.995
171	-8.367	-4.813		173	357.317
172	-7.921	-4.724		174	390.838
173	-7.925	-4.678		175	361.533
174	-7.704	-4.518		176	344.772
175	-7.99	-4.688		177	381.095
176	-7.521	-4.623		178	384.817
177	-7.625	-4.68		179	358.842
178	-7.801	-4.9		180	374.679
179	-8.394	-4.992		181	335.612
180	-8.232	-4.9		182	345.247
181	-7.654	-4.679		183	360.528
182	-8.052	-4.815		184	342.594
183	-7.846	-4.827		185	333.805
184	-8.227	-4.844		186	360.344
185	-7.777	-4.871		187	414.677
186	-7.39	-4.701		188	380.222
187	-7.949	-4.815		189	347.325
188	-8.213	-4.869		190	399.447
189	-7.407	-4.739		191	390.4
190	-7.513	-4.659		192	348.461
191	-8.345	-4.966		193	331.419
192	-8.174	-4.894		194	323.821
193	-7.949	-4.851		195	346.777
194	-7.62	-4.848		196	382.942
195	-7.375	-5.003		197	371.159
196	-7.932	-5.032		198	338.142
197	-8.153	-5.119		199	312.203
198	-7.398	-4.515		200	346.741
199	-2.195	-1.834		201	496.219
200	-2.137	-1.48		202	567.658
201	-2.093	-1.531		203	599.882
202	-2.274	-1.426		204	597.484
203	-3.308	-1.949		205	575.663
204	-2.733	-1.742		206	554.541
205	-3.006	-1.855		207	557.006
206	-2.918	-1.592		208	566.864
207	-4.51	-2.334		209	570.742
208	-4.601	-2.475		210	582.697
209	-4.912	-2.614		211	564.694
210	-4.269	-2.4		212	555.107
211	-3.697	-2.253		213	553.161
212	-4.571	-2.379		214	574.784
213	-4.478	-2.442		215	592.51
214	-4.513	-2.464		216	600.52
215	-4.146	-2.386		217	613.783
216	-3.714	-2.143		218	636.089
217	-2.345	-1.668		219	632.43
218	-2.509	-1.605		220	606.274
219	-3.236	-1.898		221	609.143
220	-2.169	-1.381		222	571.44
221	-3.021	-1.674		223	570.86
222	-3.629	-2.011		224	572.875
223	-3.752	-2.063		225	576.592
224	-3.371	-1.986		226	565.372
225	-3.705	-2.125		227	564.342
226	-3.764	-2.112		228	574.609
227	-3.952	-2.241		229	566.573
228	-4.555	-2.292		230	548.156
229	-5.639	-2.776		231	552.147
230	-5.377	-2.694		232	562.8
231	-5.034	-2.601		233	554.142
232	-4.824	-2.379		234	526.497
233	-3.576	-2.044		235	548.817
234	-2.413	-1.563		236	601.409
235	-1.4	-1.182		237	610.729
236	-1.883	-1.185		238	594.012
237	-2.273	-1.406		239	567.768
238	-1.402	-0.991		240	605.903
239	-1.497	-1.002		241	641.966
240	-2.159	-1.28		242	628.723
241	-1.553	-1.109		243	584.785
242	-5.014	-2.399		244	550.373
243	-3.834	-2.219		245	569.418
244	-4.88	-2.402		246	557.636
245	-5.76	-2.793		247	547.421
246	-4.653	-2.353		248	549.553
247	-4	-2.215		249	552.238
248	-3.966	-2.165		250	561.757
249	-4.344	-2.314		251	563.216
250	-4.758	-2.463		252	533.464
251	-5.043	-2.58		253	526.101
252	-5.145	-2.635		254	484.159
253	-5.634	-2.903		255	463.064
254	-6.47	-3.068		256	486.702
255	-6.223	-3.151		257	511.337
256	-5.883	-3.012		258	517.471
257	-5.301	-2.834		259	506.463
258	-5.716	-2.918		260	502.108
259	-6.046	-3.02		261	511.729
260	-6.291	-3.061		262	526.526
261	-5.883	-3.136		263	525.687
262	-5.853	-3.023		264	533.759
263	-5.736	-2.989		265	516.73
264	-6.142	-3.128		266	513.365
265	-5.792	-3.001		267	493.38
266	-6.52	-3.185		268	473.65
267	-7.082	-3.428		269	489.639
268	-6.732	-3.208		270	482.863
269	-6.128	-2.98		271	495.507
270	-5.509	-2.716		272	591.116
271	-5.489	-2.77		273	612.167
272	-5.757	-2.865		274	541.449
273	-6.303	-3.025		275	538.528
274	-5.784	-2.837		276	555.664
275	-5.733	-2.793		277	550.262
276	-5.355	-2.685		278	550.762
277	-5.338	-2.695		279	573.127
278	-6.182	-2.9		280	558.936
279	-5.216	-2.695		281	577.856
280	-5.177	-2.719		282	572.813
281	-5.296	-2.7		283	566.271
282	-5.559	-2.852		284	562.098
283	-6.001	-2.924		285	538.384
284	-6.284	-3.118		286	527.709
285	-5.861	-2.94		287	526.167
286	-5.67	-2.977		288	524.115
287	-6.117	-2.996		289	512.59
288	-6.351	-3.183		290	513.335
289	-6.084	-3.04		291	533.951
290	-5.295	-2.938		291.417	587.107
291	-5.842	-3.012		291.834	558.242
292	-4.948	-2.618		292.251	533.752
293	-6.1	-3.156		292.668	546.915
294	-5.9	-3.128		293.085	592.159
295	-6.535	-3.282		293.502	582.451
296	-7.013	-3.527		293.919	540.553
297	-6.802	-3.358		294.336	538.084
298	-6.371	-3.311		294.753	528.886
299	-6.441	-3.247		295.17	503.898
300	-6.604	-3.331		295.587	495.631
301	-6.468	-3.25		296	490.715
302	-6.169	-3.214		297.636	504.105
303	-5.865	-3.06		299.272	510.58
304	-5.98	-3.067		300.908	528.01
305	-5.94	-3.101		302.544	544.381
306	-6.202	-3.122		304.18	548.172
307	-6.285	-3.088		305.816	551.786
308	-6.098	-2.983		307.452	547.82
309	-5.544	-2.837		309.088	525.92
310	-4.95	-2.476		310.724	495.149
311	-4.545	-2.404		312.36	491.575
312	-4.6	-2.376		314	483.866
313	-7.125	-3.227		314.286	482.545
314	-7.315	-3.382		314.572	492.026
315	-7.194	-3.319		314.858	485.864
316	-7.543	-3.414		315.144	490.593
317	-7.129	-3.327		315.43	484.295
318	-6.907	-3.226		315.716	494.7
319	-6.636	-3.192		316	479.004
320	-6.522	-3.102		316.875	493.781
321	-6.769	-3.169		317.75	516.137
322	-7.242	-3.398		318.625	551.682
323	-6.838	-3.403		319.5	561.067
324	-6.884	-3.324		320.375	505.6
325	-6.857	-3.327		321.25	493.115
326	-6.414	-3.128		322.125	487.936
327	-6.15	-3.145		323	476.173
328	-5.896	-2.975		323.706	472.472
329	-5.976	-3.087		324.412	473.873
330	-6.04	-3.023		325.118	491.504
331	-6.99	-3.351		325.824	499.692
332	-7.256	-3.388		326.53	523.575
333	-6.529	-3.278		327.236	527.827
334	-6.809	-3.267		327.942	523.335
335	-7.382	-3.47		328.648	524.041
336	-7.812	-3.595		329.354	527.457
337	-7.571	-3.569		330.06	537.041
338	-6.75	-3.241		330.766	526.71
339	-6.398	-3.084		331.472	520.398
340	-6.481	-3.173		332.178	514.711
341	-6.407	-3.256		332.884	517.585
342	-5.607	-2.946		333.59	502.459
343	-3.79	-2.14		334.296	482.708
344	-2.772	-1.682		335	481.573
345	-2.083	-1.398		335.256	487.209
346	-3.385	-1.915		335.512	477.366
347	-2.598	-1.697		335.768	460.365
348	-1.554	-1.38		336.024	454.054
349	-2.146	-1.539		336.28	460.273
350	-2.727	-1.714		336.536	457.171
351	-4.8	-2.582		337	451.389
352	-5.651	-2.862		340	453.211
353	-6.154	-3.099		340.714	462.877
354	-6.34	-3.101		341.428	489.524
355	-6.323	-3.133		342.142	526.426
356	-6.391	-3.064		342.856	558.354
357	-6.449	-3.224		343.57	563.399
358	-6.382	-3.216		344.284	555.569
359	-6.159	-3.137		345	551.827
360	-6.117	-2.929		346	568.116
361	-6.205	-3.066		347	586.428
362	-6.55	-3.252		348	592.972
363	-5.875	-3.032		349	575.362
364	-6.063	-3.09		350	571.267
365	-6.061	-3.121		351	543.436
366	-5.412	-2.825		352	510.328
367	-5.653	-2.986		353	500.375
368	-5.772	-2.908		354	478.252
369	-4.947	-2.534		355	465.811
370	-4.4798	-2.2943		356.167	482.034
371	-4.863	-2.422		357.334	479.822
372	-5.326	-2.709		358.501	487.427
373	-4.732	-2.406		359.668	488.923
374	-4.271	-2.256		360.835	476.208
375	-4.36	-2.236		362	451.574
376	-4.417	-2.195		362.8	466.413
377	-3.889	-2.159		363.6	480.488
378	-4.405	-2.247		364.4	486.719
379	-5.697	-2.673		365.2	501.823
380	-6.532	-3.057		366	502.155
381	-5.91	-2.87		366.8	532.515
382	-6.135	-2.88		367.6	554.011
383	-6.783	-3.157		368.4	579.275
384	-6.638	-3.211		369.2	616.458
385	-6.373	-3.052		370	597.789
386	-5.812	-2.73		370.462	585.465
387	-6.456	-3.066		370.924	573.069
388	-6.604	-3.046		371.386	555.964
389	-7.146	-3.334		371.848	551.313
390	-7.62	-3.511		372.31	539.628
391	-7.158	-3.355		372.772	528.621
392	-6.599	-3.015		373.234	534.181
393	-6.863	-3.152		373.696	528.405
394	-7.071	-3.172		374.158	563.841
395	-6.44	-3.014		374.62	580.138
396	-6.171	-2.853		375.082	575.851
397	-5.954	-2.808		375.544	555.311
398	-5.608	-2.746		376	542.802
399	-5.7	-2.811		377.428	522.169
400	-3.2535	-1.9363		378.856	508.98
401	-5.201	-2.539		380.284	524.627
402	-5.738	-2.787		381.712	519.301
403	-6.263	-2.942		383.14	528.221
404	-6.082	-3.037		384.568	574.588
405	-6.516	-3.115		386	544.268
406	-6.5269	-3.103		387.33	515.225
407	-6.894	-3.203		388.66	523.244
409	-7.13	-3.386		400	544.738
410	-7.316	-3.459		401.429	534.512
411	-7.476	-3.43		402.858	518.493
412	-7.3557	-3.4		404.287	492.786
413	-7.285	-3.347		405.716	467.719
414	-7.636	-3.508		407.145	456.022
415	-7.727	-3.52		408.574	469.258
416	-7.603	-3.498		410	452.924
417	-7.762	-3.408		410.875	455.566
418	-7.859	-3.59		411.75	456.626
419	-7.679	-3.546		412.625	440.191
420	-7.526	-3.539		413.5	434.763
421	-7.609	-3.511		414.375	438.659
422	-7.57	-3.506		415.25	423.404
423	-6.615	-3.638		416.125	417.676
424	-7.655	-3.653		417	430.017
425	-7.162	-3.381		417.875	422.835
426	-6.685	-3.195		418.75	420.813
427	-6.932	-3.25		419.625	423.65
428	-6.491	-3.15		420.5	438.737
429	-6.604	-3.24		421.375	430.156
430	-6.397	-3.223		422.25	426.63
431	-6.474	-3.232		423.125	442.306
432	-4.8403	-3.6858		424	430.439
				425	445.496
				426	472.597
				427	516.109

## Sheet: FIWI - mean
Sample name	Depth [mm]	Age [ka]	𝛿18Ow measured [‰ VSMOW]	±	𝛿18Oc [‰ VPDB]	±	T* [°C]	±	𝛿2Hw measured [‰ VSMOW]	±	Water content [µL/g]	±	d-excess	±
BL3-11-1	426	48.1047	-3.71821	0.190947	-3.20205	0.0903299	16.7791	2.14634	-14.6917	0.367572	2.69655	0.589758	16.2391	0.784875
BL3-11-2	415.5	47.9014	-3.77555	0.460807	-3.45904	0.0523952	17.8363	2.16287	-16.65	1.1935	1.59616	0.317961	13.2476	3.61642
BL3-11-3	406	47.7271	-3.48462	0.341121	-3.08186	0	17.3798	1.78949	-14.6622	1.33517	1.38322	0.228481	10.9211	0.330962
BL3-11-4	392.5	47.4623	-2.92242	0.22818	-2.991	0	19.8737	2.13152	-13.7841	1.16971	2.23945	0.250922	11.7353	5.65332
BL3-11-5	381.5	47.2309	-3.38454	0.455734	-3.02417	0.0574464	17.6083	2.37541	-14.4087	0.829465	1.84124	0.397476	12.075	2.42305
BL3-10-1	372.5	47.0581	-3.7706	0.188065	-2.9849	0	15.3764	2.06988	-17.3787	1.50853	2.39868	0.0866199	12.5819	1.81799
BL3-10-2	360	46.8384	-3.58293	0.32838	-3.04627	0.118882	16.6768	1.65216	-16.3987	0.885955	2.31726	0.0653123	10.8092	4.58365
BL3-10-3	349	46.657	-3.04093	0.236691	-2.2871	0	15.5459	2.08321	-15.134	1.33159	2.7401	0.452407	9.64675	2.86842
BL3-9-1	339	46.5041	-3.33504	0.241744	-3.16293	0.123845	18.5916	2.12234	-14.6278	1.01712	2.80825	0.65172	12.4128	3.1812
BL3-9-2	331	46.3934	-3.35718	0.345375	-3.1992	0.05885	18.6705	1.63982	-16.2491	2.25028	2.41076	1.11466	11.4236	5.07329
BL3-9-3	325	46.3149	-3.37593	0.181723	-3.3741	0	19.4967	2.14382	-14.8982	0.612236	2.63068	1.06057	11.6669	0.652567
BL3-9-4	317	46.2271	-3.16453	0.331394	-3.27453	0.173149	20.1076	2.62815	-13.3524	1.57193	2.65288	0.398397	8.84423	2.68786
BL3-8-1	301.5	46.1159	-2.45137	0.403092	-3.0865	5.43896e-16	22.9392	2.18907	-11.9735	0.632942	3.47777	0.559059	9.32301	3.12388
BL3-8-2	294.5	46.0747	-2.85208	0.0984707	-3.0081	0	20.339	2.14198	-13.5596	0.769399	3.39037	0.479322	10.1499	2.31166
BL3-8-3	287.5	46.0597	-3.31658	0.101122	-3.2565	5.43896e-16	19.185	2.12751	-15.239	0.204149	3.1134	0.192358	10.0591	2.8677
BL3-7-1	272.5	46.0506	-3.033	0.25453	-3.2072	0	20.4401	1.36796	-14.1464	1.03853	3.25862	0.846957	10.6413	1.00113
BL3-7-3	260	45.9862	-3.18446	0.211882	-2.9699	5.43896e-16	18.3679	2.11017	-14.2749	0.83174	1.91179	0.445435	9.82718	4.75745
BL3-7-5	245.5	45.8587	-2.38848	0.151991	-2.6782	0	21.0576	2.14348	-10.1665	0.502339	5.87678	0.974344	9.53226	2.23859
BL3-7-7	237	45.7558	-2.52012	0.214656	-2.1503	0	17.5509	2.11141	-11.894	1.25097	4.61379	2.7297	4.62703	7.72997
BL3-6-1	231	45.6659	-0.524296	0.435001	-2.43385	0.247417	30.0579	3.89735	-1.94721	2.94803	3.11368	0.433173	2.13062	6.26323
BL3-6-2	221.5	45.525	-0.882948	0.66081	-1.9673	0.0330822	25.4201	3.63953	-3.23535	1.72626	2.87177	0.339627	2.93739	6.5724
BL3-6-3	211	45.383	-0.744139	0.369057	-2.39233	0.0123977	28.5582	2.14846	-1.82601	1.56234	2.83666	0.424513	4.95891	2.11011
BL3-6-4	203.5	45.2985	-0.952008	0.158032	-1.8808	0.0425602	24.5348	2.19794	-4.07681	1.25677	2.20701	0.118659	11.0471	10.6283
BL3-T-1	15	1.88465	-4.15984	0.797322	-3.9412	0	18.3721	4.22152	-17.1318	1.82917	0.798272	0.269184	10.3689	16.3791

## Sheet: FIWI - all data
	Sample name	Depth [mm]	Age [ka]	𝛿18Ow measured [‰ VSMOW]	𝛿18Oc [‰ VPDB]	T* [°C]	𝛿2Hw measured [‰ VSMOW]	Water content [µL/g]	d-excess
University of Bergen	BL3-11-1-1	426	48.1047	-3.52691	-3.1076	17.2856	-14.299	3.35109	15.4523
	BL3-11-1-1b	426	48.1047	-3.71892	-3.2876	17.2222	-15.0276	2.53209	16.2429
	BL3-11-1-2	426	48.1047	-3.90881	-3.21096	15.8294	-14.7484	2.20649	17.0221
	BL3-11-2-1	415.5	47.9014	-3.97131	-3.47712	16.8919	-17.6874	1.3989	15.1618
	BL3-11-2-2	415.5	47.9014	-4.10615	-3.5	16.3063	-16.917	1.96296	9.07642
	BL3-11-2-3	415.5	47.9014	-3.24918	-3.4	20.3108	-15.3456	1.42662	15.5046
	BL3-11-3-1	406	47.7271	-3.85628	-3.08186	15.4321	-14.5529	1.62461	10.9335
	BL3-11-3-2	406	47.7271	-3.1858	-3.08186	18.9513	-16.0487	1.17032	11.2457
	BL3-11-3-3	406	47.7271	-3.41179	-3.08186	17.7559	-13.385	1.35472	10.5841
	BL3-11-4-1	392.5	47.4623	-2.99614	-2.991	19.477	-14.4955	2.34345	10.3415
	BL3-11-4-2	392.5	47.4623	-3.10463	-2.991	18.9	-14.4227	1.95324	6.90922
	BL3-11-4-3	392.5	47.4623	-2.66649	-2.991	21.2441	-12.4341	2.42165	17.9551
	BL3-11-5-1	381.5	47.2309	-3.79866	-2.991	15.2602	-15.2965	1.38626	12.373
	BL3-11-5-2	381.5	47.2309	-3.45868	-3.0905	17.5545	-13.6535	2.12103	9.51678
	BL3-11-5-3	381.5	47.2309	-2.89628	-2.991	20.0101	-14.2763	2.01642	14.3353
	BL3-10-1-1	372.5	47.0581	-3.57645	-2.9849	16.3841	-15.7328	2.3366	14.863
	BL3-10-1-2	372.5	47.0581	-3.82448	-2.9849	15.0949	-18.847	2.42569	13.2136
	BL3-10-1-3	372.5	47.0581	-4.00758	-2.9849	14.1504	-18.4539	2.50925	10.9373
	BL3-10-1-4	372.5	47.0581	-3.6739	-2.9849	15.8762	-16.4809	2.32318	11.3139
	BL3-10-2-1	360	46.8384	-3.47435	-2.909	16.5212	-15.5433	2.25308	11.0374
	BL3-10-2-2	360	46.8384	-3.3226	-3.11491	18.4013	-16.3403	2.31506	15.2745
	BL3-10-2-3	360	46.8384	-3.95185	-3.11491	15.108	-17.3124	2.38365	6.11571
	BL3-10-3-1	349	46.657	-2.92851	-2.2871	16.1264	-13.4765	2.38075	11.6194
	BL3-10-3-2	349	46.657	-3.13698	-2.2871	15.0447	-16.6454	2.32085	5.58554
	BL3-10-3-3	349	46.657	-2.77887	-2.2871	16.9077	-14.8348	3.07456	11.7201
	BL3-10-3-4	349	46.657	-3.31937	-2.2871	14.1048	-15.5792	3.18423	9.66203
	BL3-9-1-1	339	46.5041	-3.15516	-3.0201	18.7862	-13.6446	3.11218	15.1646
	BL3-9-1-2	339	46.5041	-3.60114	-3.2283	17.5297	-15.7751	2.63014	9.25663
	BL3-9-1-3	339	46.5041	-3.12897	-3.0201	18.9252	-13.8368	2.26411	12.3633
	BL3-9-2-1	331	46.3934	-3.27501	-3.2404	19.32	-14.2714	3.53051	15.6184
	BL3-9-2-2	331	46.3934	-3.73623	-3.2254	16.8054	-18.6975	1.30127	5.7849
	BL3-9-2-3	331	46.3934	-3.0603	-3.1318	19.8861	-15.7784	2.40049	12.8675
	BL3-9-3-1	325	46.3149	-3.58073	-3.3741	18.4066	-14.9203	3.52154	10.9515
	BL3-9-3-2	325	46.3149	-3.23397	-3.3741	20.2534	-14.2752	1.45752	12.2295
	BL3-9-3-3	325	46.3149	-3.31308	-3.3741	19.8301	-15.499	2.91299	11.8197
	BL3-9-4-1	317	46.2271	-3.41485	-3.0865	17.7642	-14.6179	2.21457	11.7022
	BL3-9-4-2	317	46.2271	-3.29002	-3.3097	19.6094	-13.8464	2.75108	8.4633
	BL3-9-4-3	317	46.2271	-2.78871	-3.4274	22.9492	-11.5928	2.993	6.36715
	BL3-8-1-1	301.5	46.1159	-2.24499	-3.0865	24.0581	-11.7246	3.99311	5.82144
	BL3-8-1-2	301.5	46.1159	-2.19326	-3.0865	24.3426	-11.5028	2.8834	11.8241
	BL3-8-1-3	301.5	46.1159	-2.91586	-3.0865	20.4168	-12.693	3.55681	10.3235
	BL3-8-2-1	294.5	46.0747	-2.87707	-3.0081	20.2045	-12.7938	3.89754	10.6914
	BL3-8-2-2	294.5	46.0747	-2.93564	-3.0081	19.8911	-14.3325	3.32871	7.61561
	BL3-8-2-3	294.5	46.0747	-2.74352	-3.0081	20.9213	-13.5525	2.94486	12.1428
	BL3-8-3-1	287.5	46.0597	-3.21191	-3.2565	19.7423	-15.0702	3.09827	12.2397
	BL3-8-3-2	287.5	46.0597	-3.41374	-3.2565	18.6684	-15.4659	3.31288	11.1269
	BL3-8-3-3	287.5	46.0597	-3.3241	-3.2565	19.1444	-15.181	2.92906	6.81069
	BL3-7-1-1	272.5	46.0506	-2.74897	-3.2072	21.9674	-14.2125	4.22401	11.7109
	BL3-7-1-2	272.5	46.0506	-3.24042	-3.2072	19.3274	-15.1503	2.91138	9.72668
	BL3-7-1-3	272.5	46.0506	-3.10963	-3.2072	20.0255	-13.0764	2.64047	10.4863
	BL3-7-3-1	260	45.9862	-2.94534	-2.9699	19.6354	-13.4444	2.42306	12.6292
	BL3-7-3-2	260	45.9862	-3.2592	-2.9699	17.9703	-14.2725	1.60756	12.5182
	BL3-7-3-3	260	45.9862	-3.34884	-2.9699	17.4981	-15.1078	1.70474	4.33413
	BL3-7-5-1	245.5	45.8587	-2.43025	-2.6782	20.8314	-10.2713	6.96393	9.85055
	BL3-7-5-2	245.5	45.8587	-2.51523	-2.6782	20.3753	-10.6083	5.58407	7.15155
	BL3-7-5-3	245.5	45.8587	-2.21998	-2.6782	21.966	-9.62009	5.08234	11.5947
	BL3-7-7-1	237	45.7558	-2.65184	-2.1503	16.8569	-12.6985	2.80334	6.5431
	BL3-7-7-2	237	45.7558	-2.40521	-2.1503	18.153	-10.3143	6.03691	11.6345
	BL3-7-7-3	237	45.7558	-2.74359	-2.1503	16.3776	-11.4906	7.72086	6.74808
	BL3-7-7-4	237	45.7558	-2.27984	-2.1503	18.8161	-13.0726	1.89406	-6.41755
	BL3-6-1-2	231	45.6659	-0.831888	-2.2589	27.3021	-4.03178	3.41998	-2.29815
	BL3-6-1-3	231	45.6659	-0.216703	-2.6088	32.8137	0.137359	2.80738	6.5594
	BL3-6-2-1	221.5	45.525	-0.802755	-1.9291	25.6236	-2.32928	2.72393	-0.202124
	BL3-6-2-2	221.5	45.525	-0.265894	-1.9864	28.9535	-2.15077	3.26027	10.4908
	BL3-6-2-3	221.5	45.525	-1.5802	-1.9864	21.683	-5.22601	2.63113	-1.4765
	BL3-6-3-1	211	45.383	-0.468688	-2.4027	30.1723	-0.143046	3.00117	4.65908
	BL3-6-3-2	211	45.383	-0.600265	-2.3957	29.3827	-2.1048	3.1543	7.2029
	BL3-6-3-3	211	45.383	-1.16346	-2.3786	26.1197	-3.23018	2.35451	3.01476
	BL3-6-4-1	203.5	45.2985	-0.780617	-1.9281	25.7408	-2.9815	2.33792	4.88614
	BL3-6-4-2	203.5	45.2985	-0.983455	-1.8687	24.2926	-3.80003	2.10652	4.93558
	BL3-6-4-3	203.5	45.2985	-1.09195	-1.8456	23.5711	-5.4489	2.1766	23.3195
	BL3-T-1-1	15	1.88465	-3.59605	-3.9412	21.3572	-15.8384	0.607931	21.9507
	BL3-T-1-2	15	1.88465	-4.72363	-3.9412	15.3871	-18.4252	0.988614	-1.21283
	BL3-T-1-3	15	1.88465	-2.15155	-3.9412	29.3657	-14.8409	0.527509	10.9932
University of Bern	4.1	232	45.6854	-1	-1.79	23.7698	-2		-2
	4.2**	236	45.7437		-1.17	25.8609	0.1		17.7
	4.3	241	45.8125	-2.2	-2.18	19.3979	-9.2		10
	4.4	247	45.8721	-2.4	-2.35	19.2383	-9.7		6.3
	4.5	252	45.9266	-2	-2.93	24.5442	-9.6		10.4
	4.6	259	45.9854	-2.5	-3.05	22.465	-9.5		14.5
	4.7	266	46.028	-3	-3.1	20.0384	-12.7		-6.767
	*	Calculated using the equtation from Tremaine et al. (2011)
	**	Very low water content. The data are not included in the figures.

## Sheet: Microthermometry - mean
Sample name	Depth [mm]	Age [ka]	T [°C]	Std error [2𝜎]
11_1	426	48.1	17.9	1.1
11_3	406	47.73	18.5	1
11_5	382	47.23	19.2	0.8
10_1	373	47.06	18.453	1.4
10_2	360	46.84	18.224	1
10_3	349	46.66	17.7	1.1
9_1	339	46.5	18.4	1.9
9_3	325	46.31	19.8	0.7
8_1	302	46.12	18.1	1.4
4_4	285	46.06	17.7	1.2
4_1	243	45.83	19.5	0.7
4_2	239	45.78	20.5	0.8
4_3	233	45.7	20.7	1.3
6_2	222	45.53	19.1	0.6
6_3	211	45.38	18.5	1.6
6_4	204	45.3	18.4	1.7
1_1	14	1.7561	17.6	0.6

## Sheet: Microthermometry - all data
	Th measured [°C]	Bubble radius [µm]	Thinf [°C]	V [µm3]
1_1	13	0.62048	15.4371	1586.6
	12.8	0.6548	15.1834	1917.5
	19.4	1.14114	20.6317	3986.8
	17.7	1.03702	19.0884	3735.9
	12.5	0.73518	15.2608	1123.1
	13.6	0.543353	16.2222	911.337
	11.2	0.773646	13.5067	4700.1
	13.6	0.476398	16.4521	625.947
	19.2	0.765651	20.8583	1220.5
	19.9	0.999348	21.2394	2519.1
	17.4	0.784558	19.1345	1597.5
	17.5	0.940861	19.0071	2815
	13.7	0.532554	16.3467	846.923
	20.5	1.84407	21.3371	15204
	16.9	1.08377	18.2882	4709.2
	11.2	0.609481	13.9223	2198.8
	17.1	0.567495	19.3069	626.037
	13.2	0.58169	15.6488	1256.6
6_4	14	0.220684	18.8579	46.7417
	17.4	0.332345	20.6529	107.933
	11.7	0.247537	16.5864	105.418
	12.1	0.240471	17.0335	85.4791
	14.5	0.191326	19.7832	26.8595
	9.4	0.267619	14.6187	224.841
	17.3	0.365637	20.3033	157.273
	10.3	0.308504	14.8345	290.747
	13.9	0.267619	17.5913	173.288
6_3	9.6	0.201061	15.9675	73.3804
	15.3	0.170195	20.8595	16.7155
	8.4	0.225676	14.5134	166.649
	13.8	0.170195	19.6437	20.5869
	17.4	0.257774	21.2624	50.3859
	10.9	0.278403	15.603	180.835
	16.7	0.225676	21.0038	37.168
	13.1	0.221942	18.1259	53.8959
	14.7	0.236859	19.1598	55.9636
6_2	16.4	0.442268	19.1271	305.233
	17.6	0.463872	20.2228	259.773
	18.5	0.308504	21.7964	77.2149
	15.2	0.372643	18.4205	210.508
	14.1	0.308504	17.9043	140.931
	15.7	0.305132	19.2918	110.81
	16.2	0.308504	19.7329	103.405
	15.2	0.349388	18.5505	176.109
	13.9	0.314634	17.7337	145.57
	16.4	0.316651	19.8308	111.422
	15.1	0.392913	18.2166	251.857
	15	0.374949	18.2413	215.93
4_3	14.5	0.320646	18.1638	146.671
	17.8	0.210345	22.2492	24.2635
	14.7	0.197869	19.7648	30.8826
	17.3	0.210345	21.8117	25.7288
	17.1	0.225676	21.3536	35.3162
4_2	16.7	0.491201	19.1967	411.225
	18.8	1.01558	20.1614	3054.5
	19.7	0.920079	21.1342	1994.3
	15.1	0.396541	18.1592	272.694
	18	0.446922	20.549	265.127
	20.2	0.505362	22.3889	303.447
	18.5	0.512295	20.793	369.436
	18.6	0.432259	21.1901	21.1901
	20	1.0261	21.3073	2725.5
4_1	18.6	0.461	21.1	270
	13.8	0.272	18	100
	17.5	0.351	20.6	130
	13.6	0.431	16.7	440
	18.4	0.632	20.4	730
	17.8	0.463	20.3	300
4_4	11.9	0.267619	16.4911	131.328
	15.1	0.225676	19.6299	45.9331
	17.6	0.298808	21.0647	77.7067
	15.4	0.349388	18.7268	170.958
	9.7	0.267619	14.8255	209.918
	15.3	0.215577	19.9431	38.743
	10.3	0.210345	16.1543	77.514
	14	0.254407	18.4455	70.9758
	11.8	0.340973	15.7455	286.267
	11.3	0.308504	15.6056	233.593
	13.1	0.320646	16.9705	185.122
	13.7	0.298808	17.6546	135.141
8_1	13.4	0.365637	16.8594	279.92
	17.6	0.316651	20.9066	95.4553
	14	0.308504	17.8189	143.218
	12.4	0.308504	16.4882	188.319
	14.7	0.332345	18.2579	157.104
9_3	16.4	0.326548	19.7556	122.949
	17.5	0.281907	21.1492	62.9954
	15.3	0.254407	19.5436	58.5396
	13.9	0.225676	18.2179	54.8823
	14.5	0.267619	18.6338	84.4731
	17.6	0.210345	20.3531	24.8385
	18.5	0.308504	20.8935	77.2149
	16.4	0.288786	20.0827	81.2755
	14.5	0.210345	19.4279	37.3191
9_1	15.1	0.225676	19.6299	45.9331
	9	0.364765	13.4406	670.487
	15.9	0.365637	19.0422	190.099
	13.5	0.660367	15.7796	1758.9
	18.2	0.308504	21.5256	80.2299
	18.5	0.374949	19.1316	135.635
	14.5	0.332345	17.2262	162.072
	19.9	0.474165	21.7727	242.932
10_3	10.5	0.288786	15.1882	222.137
	15	0.401725	18.0707	276.832
	12	0.354887	15.8301	302.661
	13.5	0.324593	17.308	172.666
	13.3	0.407364	16.534	398.223
	16.3	0.389965	19.2853	212.525
	13.5	0.340973	17.15	210.379
	9.6	0.298808	14.4164	307.824
	14.1	0.332345	17.7392	172.769
	15.9	0.278403	19.738	19.738
	17.1	0.295505	20.6167	82.7223
	13.5	0.326548	17.2262	191.004
	12.6	0.308504	16.6418	182.469
	18.6	0.332345	21.7427	93.353
10_2	19.1	0.384036	21.8957	136.792
	16	0.414401	18.9099	258.256
	12.5	0.424738	15.7902	497.978
	17.7	0.414401	20.4539	205.604
	16	0.479229	18.5959	425.351
	10.7	0.4038	14.4368	621.23
	12.8	0.37952	16.284	340.064
	18.6	0.332345	21.7427	93.353
	17.6	0.372643	20.5761	151.385
	16.6	0.494109	19.1051	416.879
	15.6	0.365637	18.7749	198.517
	17	0.463872	19.5892	323.486
	10.9	0.357605	14.8721	417.948
	10.9	0.298808	15.391	227.788
	12.8	0.365637	16.3517	311.638
	13.5	0.392913	16.8177	326.238
	17.3	0.4038	20.1385	200.194
	17.3	0.494109	19.7502	379.927
	12.4	0.332345	16.3127	230.782
	15.7	0.4038	18.6937	249.362
10_1	11.3	0.308504	15.6056	233.593
	20.5	0.67738	22.2554	715.714
	18.4	0.424738	21.0503	203.398
	11.4	0.357605	15.2662	375.581
	14.6	0.398809	17.7134	294.473
	9.5	0.357605	13.8049	585.074
	18.6	0.4038	21.3307	170.362
	17.8	0.364765	20.8179	135.363
	12.2	0.314634	16.3253	195.52
	20.7	0.660367	22.485	638.283
	13.4	0.463872	16.366	564.953
	12.4	0.397343	15.8254	433.092
	15.4	0.449585	18.1815	379.695
	20.2	0.546565	22.2701	383.827
	16.1	0.37868	19.1619	201.27
	10.6	0.398809	14.3575	636.001
	18	0.37952	20.8847	156.745
11_5	17.8	0.370125	20.7585	147.647
	14.9	0.320646	18.5105	137.939
	11.9	0.278403	16.3753	148.387
	14.9	0.278403	18.8711	89.5386
	14.6	0.320646	18.2502	144.409
	15.8	0.349388	19.0811	161.336
	13.5	0.298808	17.4859	139.724
	15.8	0.397343	18.7831	245.787
	18.8	0.55106	20.9494	450.185
	16.2	0.354887	19.4374	152.527
	16	0.365637	19.1316	187.416
	16.4	0.308504	19.9102	100.654
11_3	15.9	0.414401	18.8201	261.979
	16.8	0.472372	19.3655	355.847
	14.7	0.431522	17.6494	365.713
	15.6	0.449585	18.3603	368.143
	16.9	0.494109	19.3803	400.059
	16.1	0.353689	19.3482	154.658
	16.4	0.356713	19.5517	162.383
	15.8	0.308504	19.3798	109.265
	16.6	0.42132	19.3997	255.756
	15.8	0.314634	19.3798	109.265
	10.8	0.320646	15.123	288.5
11_1	16.9	0.422201	19.6737	245.661
	20	0.568872	22.0255	437.646
	11.8	0.434829	15.152	619.721
	11.9	0.316651	15.9931	229.945
	18.3	0.413151	21.0052	190.867
	11.9	0.398809	15.4079	478.188
	13.4	0.456785	16.366	564.953
	20	0.660367	21.8182	689.941
	17	0.464644	19.5892	323.486
	18	0.4038	20.7787	183.217
	13.5	0.357605	17.0119	251.739
	14.9	0.39078	18.0396	259.382
	13.2	0.365637	16.6888	289.879
	15	0.372643	18.2413	215.93
	16.6	0.365637	19.6701	172.48
	18.2	0.392913	21.0138	165.08
	9.9	0.288786	14.743	254.688
	15.2	0.386274	18.3049	248.585
	16.2	0.314634	19.7329	103.405
	14.5	0.353689	17.9376	196.173
	14.5	0.434829	17.4734	377.949
